# Supplementary material for: Visualizing Dynamic Changes at the Maternal-Fetal Interface Throughout Human Pregnancy by Mass Cytometry
Source: PubMed Central journal article supplement (PMC7649376; doi:10.3389/fimmu.2020.571300), 2020-10-26

Figure S5

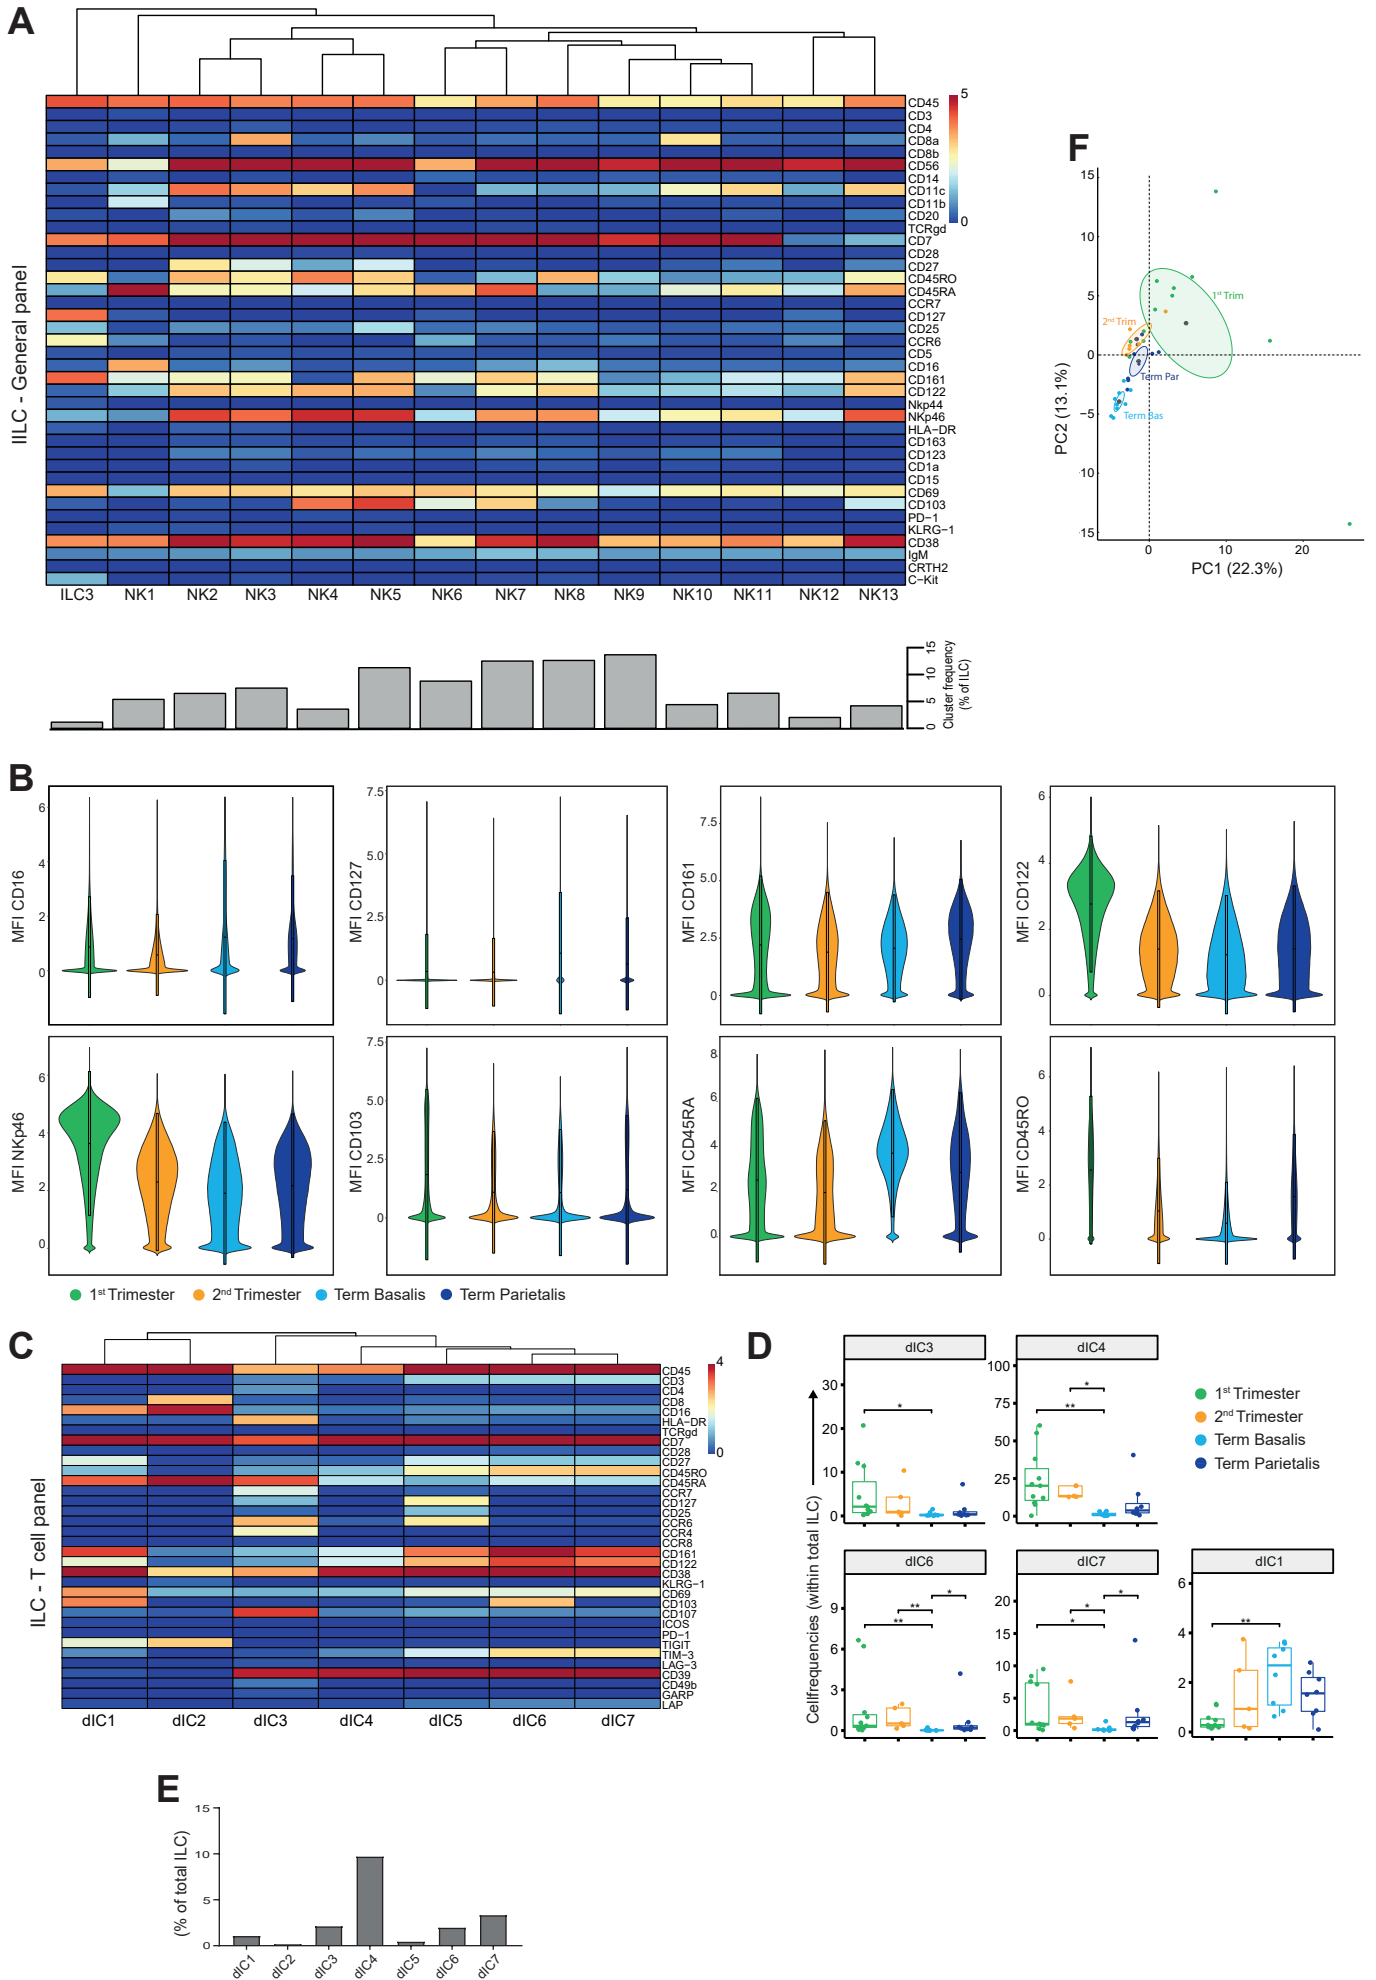

Supplement: Image_5.pdf [file Image_5.pdf]
