# Supplementary material for: Visualizing Dynamic Changes at the Maternal-Fetal Interface Throughout Human Pregnancy by Mass Cytometry
Source: PubMed Central journal article supplement (PMC7649376; doi:10.3389/fimmu.2020.571300), 2020-10-26

# Figure S6

## A

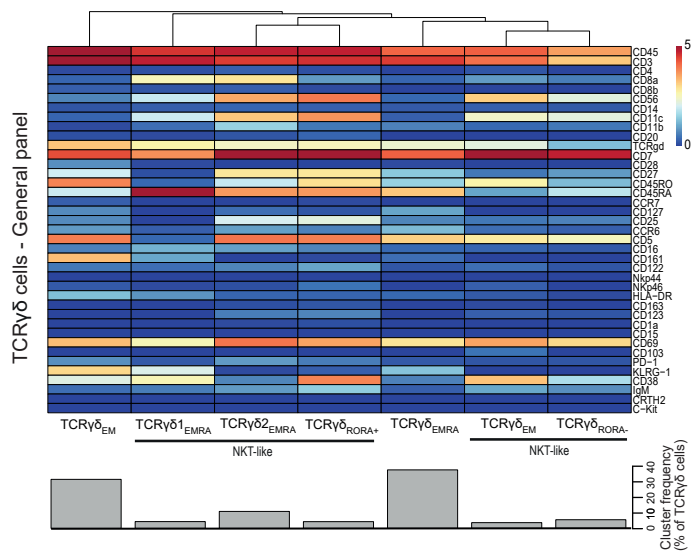

## B

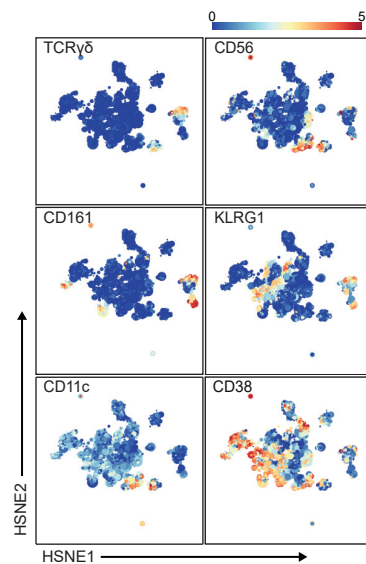

## C

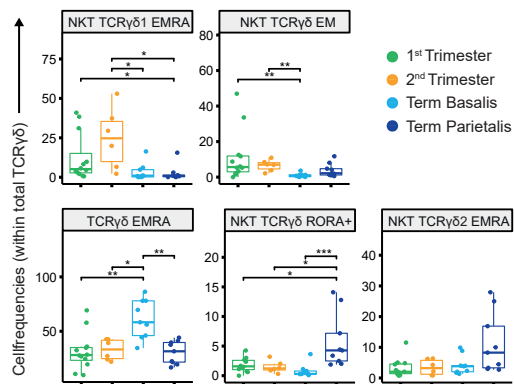

## D

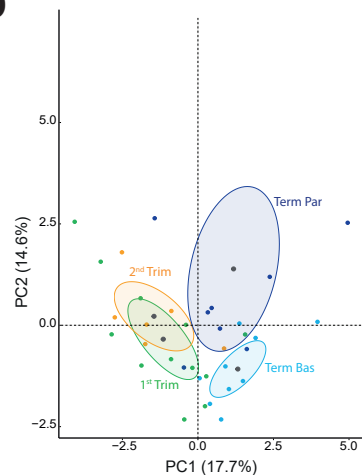

Supplement: Image_6.pdf [file Image_6.pdf]
